# Supplementary material for: Magnetic molecularly imprinted microsensor for selective recognition and transport of fluorescent phycocyanin in seawater
Source: Royal Society of Chemistry journal article supplement (doi:10.1039/c5ta00143a), 2015-01-01
Supplement: c5ta00143a1.pdf [file c5ta00143a1.pdf]

## *Supporting Information*

# **Magnetic molecularly imprinted microsensor for selective recognition and transport of fluorescent phycocyanin in seawater**

Zhong Zhang,<sup>ab</sup> Jinhua Li,<sup>a</sup> Longwen Fu<sup>a</sup>, Dongyan Liu<sup>a</sup> and Lingxin Chen<sup>\*a</sup>

<sup>a</sup> Key Laboratory of Coastal Environmental Processes and Ecological Remediation, Shandong Provincial Key Laboratory of Coastal Environmental Processes, Yantai Institute of Coastal Zone Research, Chinese Academy of Sciences, Yantai 264003, China

<sup>b</sup> University of Chinese Academy of Sciences, Beijing 100049, China

---

\* Corresponding author. Tel/Fax: +86 535 2109130.

E-mail address: lxchen@yic.ac.cn (L. Chen).

## Contents

### 1. Video caption

**SI Video 1.** Micromotor propel in the  $\text{H}_2\text{O}_2$  solution with linear and spiral motion trajectories.

**SI Video 2.** Micromotor propel in the  $\text{H}_2\text{O}_2$  solution with and without magnetic field.

**SI Video 3.** Motion speed changes of the micromotor in different concentrations  $\text{H}_2\text{O}_2$  solutions.

**SI Video 4.** Fluorescence field and bright field of magnetic micromotor in seawater with fluorescence protein.

### 2. Figure captions

**Fig. S1.** (A) Top view and (B) lateral view photographs of electrochemical cell, (C) SEM images of the front and (D) back of polycarbonate membrane, (E, F) SEM images of polycarbonate membrane after sputtering a conductive platinum layer. Inset: (D) photograph of polycarbonate membrane, (F) photograph of polycarbonate membrane after sputtering a conductive platinum layer.

**Fig. S2.** Motion image of the micromotor in the solution containing (A) 0%, (B) 1%, (C) 2% and (D) 3% sodium cholate.

**Fig. S3.** Dependence of the surface coverage on the adsorption time.

**Fig. S4.** Dependence of the surface coverage on the phycocyanin concentration.

**Fig. S5.** Fluorescence microscope photos of magnetic micromotors: (A) Time-lapse image taken with the MIP-based micromotor in the 0.5 mg/mL target protein solution for 20 min. (B) NIP micromotors in a 0.5 mg/mL target protein solution; (C) MIP-based micromotor in a solution containing the non target BSA (0.5 mg/mL).

### 3. Table caption

**Table S1.** Parameters for electrodeposition protocol.

**Table S2.** Atomic composition ratios of the micromotor from EDX mapping analysis.

**Fig. S1.** (A) Top view and (B) lateral view photographs of electrochemical cell; SEM images of the (C) front and (D) back of polycarbonate membrane; (E, F) SEM images of polycarbonate membrane after sputtering a conductive platinum layer. Inset: (D) photograph of polycarbonate membrane, (F) photograph of polycarbonate membrane after sputtering a conductive platinum layer.

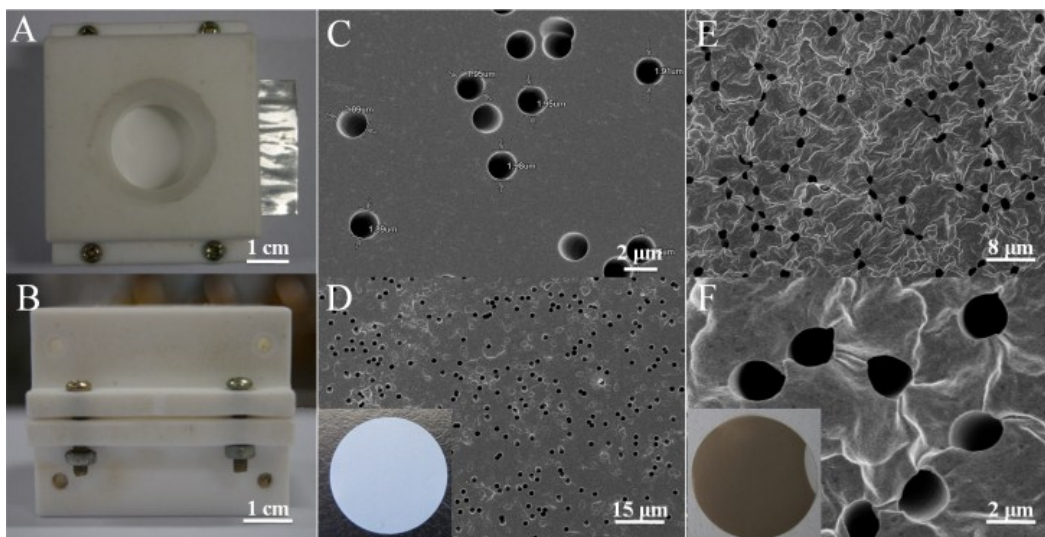

**Fig. S2.** Motion image of the micromotor in the solution containing (A) 0%, (B) 1%, (C) 2% and (D) 3% sodium cholate.

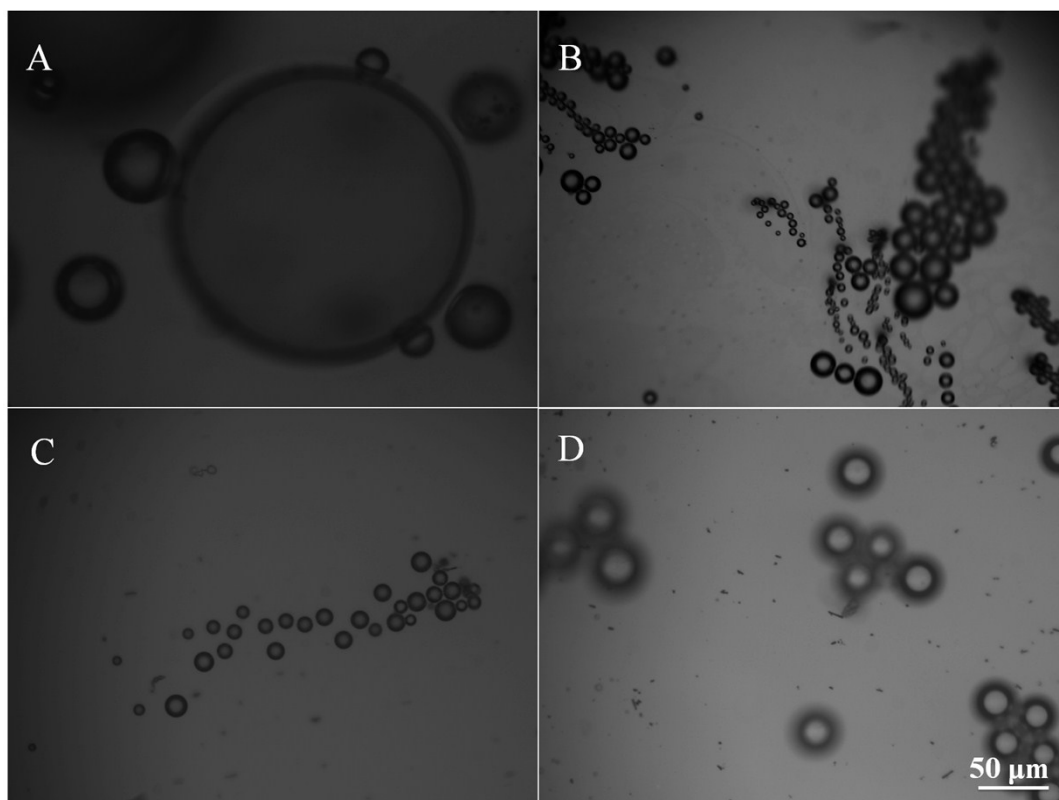

**Fig. S3.** Dependence of the surface coverage on the adsorption time.

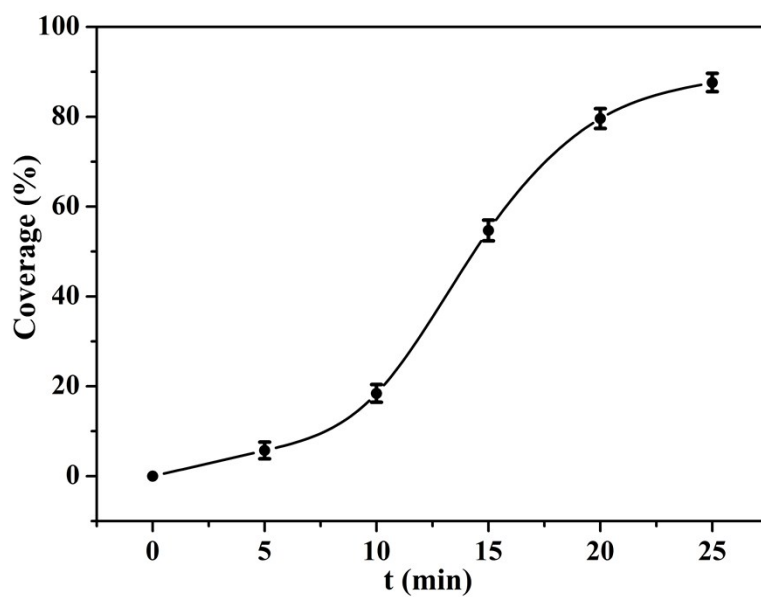

**Fig. S4.** Dependence of the surface coverage on the phycocyanin concentration.

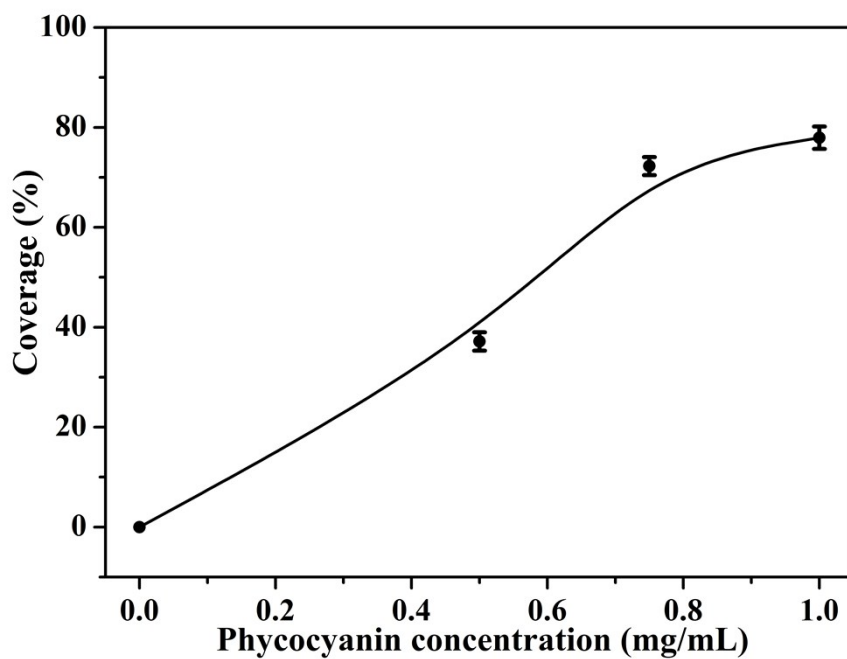

**Fig. S5.** Fluorescence microscope photos of magnetic micromotors: (A) Time-lapse image taken with the MIP-based micromotor in the 0.5 mg/mL target protein solution for 20 min. (B) NIP micromotors in a 0.5 mg/mL target protein solution; (C) MIP-based micromotor in a solution containing the non target BSA (0.5 mg/mL).

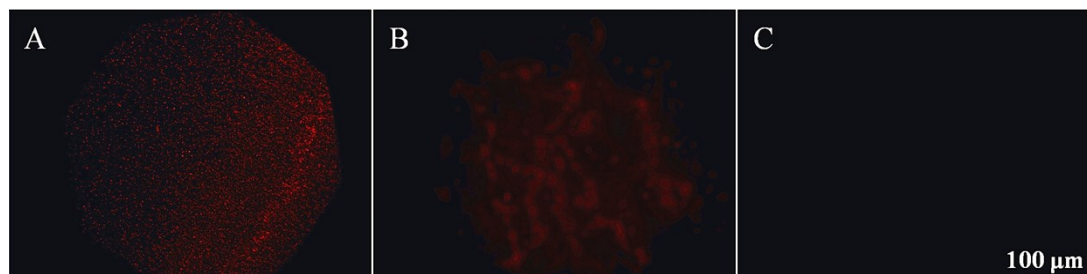

**Table S1.** Parameters for electrodeposition protocol.

| Material  | Model                  | Parameters |
|-----------|------------------------|------------|
| PEDOT/PSS | Amperometric i-t curve | +0.8V, 4C  |
| Pt        | Chronopotentiometry    | -2mA, 200s |
| Ni-Pt     | Chronopotentiometry    | -2mA, 300s |
| Ni        | Amperometric i-t curve | -1.3V, 2C  |
| Pt        | Chronopotentiometry    | -2mA, 450s |

**Table S2.** Atomic composition ratios of the micromotor from EDX mapping analysis.

| Element | Weight percentage (%) | Atomic percentage (%) |
|---------|-----------------------|-----------------------|
| C       | 9.24                  | 46.65                 |
| O       | 7.12                  | 26.99                 |
| Ni      | 0.54                  | 0.55                  |
| Pt      | 78.96                 | 24.55                 |
| Pb      | 1.38                  | 0.40                  |
